# Supplementary material for: Ancient Adaptive Evolution of the Primate Antiviral DNA-Editing Enzyme APOBEC3G
Source: PubMed Central journal article supplement (PMC479043; doi:10.1371/journal.pbio.0020275), 2004-07-20
Supplement: pbio.0020275.sg003.pdf [file pbio.0020275.sg003.pdf]

Figure S3  
Sawyer et al.

|            |                |                                  |                                             |                                              |     |
|------------|----------------|----------------------------------|---------------------------------------------|----------------------------------------------|-----|
| Human aa:  | 1              | (N-terminus)                     | (Active Site 1)                             | 58                                           |     |
| AGM        | MNPQ           | IRNMVEQMEP                       | DIFVYYFN                                    | NRPILSG   RNTVWLCYEVK--TKDPSGPPLDANIFQGKL    |     |
| Patas      | MKP            | HFRNTVERMYRGTFFYNFN              | NRPILSR   RNTVWLCYEVK--TRGPSMPTWGAKIFRGQL   |                                              |     |
| CrestMac   | MKP            | QFRNTVERMYRGTFFYSFN              | NRPILSR   RNTVWLCYEVK--TRGPSMPTWGTFKIFRGQV  |                                              |     |
| CrabEatMac | MQP            | QYRNTVERMYRGTFFYNFN              | NRPILSR   RNTVWLCYEVK--TRGPSMPTWDTKIFRGQV   |                                              |     |
| Baboon     | MKP            | QFRNTVERMYRDTFFYNFN              | NRPILSR   RNTVWLCYEVK--TRGPSMPTWDAKIFRGQV   |                                              |     |
| Chimp      | MKP            | HFRNPVERMYQDTFSDNFYN             | NRPILSH   RNTVWLCYEVK--TKGPSRPPLDAKIFRGQV   |                                              |     |
| Bonobo     | MKP            | HFRNPVERMYQDTFSDNFYN             | NRPILSR   RNTVWLCYEVK--TKGPSRPPLDAKIFRGQV   |                                              |     |
| Human      | MKP            | HFRNTVERMYRDTFSYNFY              | NRPILSR   RNTVWLCYEVK--TKGPSRPPLDAKIFRGQV   |                                              |     |
| Gorilla    | MTP            | QFRNTVERMYRDTFSYNFN              | NRPILSR   RNTVWLCYEVK--TKDPSRPPLDAKIFRGQV   |                                              |     |
| Orangutan  | MNP            | QFRNMVDGMDPHKFSYNFK              | NRPILSR   RNTVWLCYEVK--TKGPSRPPLDAKIFRGQV   |                                              |     |
| WoollyMon  | MKP            | QTRNTVVRMDPDTFFYNFY              | NRPILSH   RNTVWLCYEVKMKMTNDPSRPPLVANIFQGQV  |                                              |     |
| Tamarin    | MKP            | QTRNTVVRMDPDTFFYDFY              | NRPI LSD   RNTVWLCYEVKMKMTNDRSRPPLVAKILEGQV |                                              |     |
| Human aa:  | 59             |                                  |                                             | 117                                          |     |
| AGM        | Y-PEAKD        | <b>HPE</b> MKFLHWFRKWRQLHRDQ     | EYEV                                        | TWYVSW <b>SPCTRC</b> CANSVATFLAEDPKVTLT      |     |
| Patas      | Y-PEAKD        | <b>HPE</b> MKFLHWFRKWRQLHRDQ     | EYEV                                        | TWYVSW <b>SPCTRC</b> CANSVATFLAEDPKVTLT      |     |
| CrestMac   | Y-SKAKY        | <b>HPE</b> MRFLRWF               | SKWRQLHHDQ                                  | EYKVTWYVSW <b>SPCTRC</b> CANSVATFLAKDPKVTTLT |     |
| CrabEatMac | LR             | SKAKY <b>HPE</b> MRFLHWFR        | EWRLHHDQ                                    | EYKVTWYVSW <b>SPCTRC</b> CANSVATFLAKDPKVTTLT |     |
| Baboon     | Y-SKAKY        | <b>HPE</b> MRFLHWFRKWRQLHRDQ     | EYEV                                        | TWYVSW <b>SPCTGC</b> CANSVATFLAEDPKVTLT      |     |
| Chimp      | Y-SK           | LKY <b>HPE</b> MRFFHWFSKWRKLHRDQ | EYEV                                        | TWYISW <b>SPCTKCTR</b> DRVATFLAEDPKVTLT      |     |
| Bonobo     | Y-SK           | LKY <b>HPE</b> MRFFHWFSKWRKLHRDQ | EYEV                                        | TWYISW <b>SPCTKCTR</b> DRVATFLAEDPKVTLT      |     |
| Human      | Y-SEL          | KY <b>HPE</b> MRFFHWFSKWRKLHRDQ  | EYEV                                        | TWYISW <b>SPCTKCTR</b> DMATFLAEDPKVTLT       |     |
| Gorilla    | Y-SEL          | KY <b>HPE</b> MRFFHWFSKWRKLHRDQ  | EYEV                                        | TWYISW <b>SPCTKCTR</b> RVATFLAEDPKVTLT       |     |
| Orangutan  | Y-FEL          | KN <b>HPE</b> MRFFHWFSKWRKLHRDQ  | ECEV                                        | TWYMSW <b>SPCTKCTR</b> RVATFLAEDPKVTLT       |     |
| WoollyMon  | S-FN           | PE <b>HAEM</b> YFLSWFR-GNLL      | PACKRSQITW                                  | FVSW <b>NPCLYC</b> VAKVAEFLAEHPKVTLT         |     |
| Tamarin    | H-FD           | PE <b>HAEM</b> YFLSWFR-GNLL      | QACKSSQITW                                  | FVSW <b>NPCLNC</b> VAKVAEFLAEHPNVTTLT        |     |
| Human aa:  | 118            | 128                              | (Linker 1)                                  | (PseudoActive Site 1)                        | 177 |
| AGM        | IFV   ARLYYFWK | PDYQQALRILCQ                     | ERGGPHATMKIMNYNEFQHCW   NEFVDGQ             | GKPFKPRKN                                    |     |
| Patas      | IFV   ARLYYFWK | PDYQEALRILCQ                     | KRGPHATMKIMNYNEFQHCW   NEFVDGQ              | GKPFKPRKN                                    |     |
| CrestMac   | IFV   ARLYYFWK | PDYQQALRILCQ                     | KRGPHATMKIMNYNEFQDCW   NKFVDGR              | GKPFKPRNN                                    |     |
| CrabEatMac | IFV   ARLYYFWK | PDYQQALRILCQ                     | KRGGLHATMKIMNYNEFQDCW   NKFVDGG             | GKPFKPRNN                                    |     |
| Baboon     | IFV   ARLYYFWK | PDYQEALRVLCQ                     | KRGSPHATMKIMNYNEFQHCW   NKFVVRGR            | REPPEPWNEN                                   |     |
| Chimp      | IFV   ARLYYFWD | PDYQEALRSLCQ                     | KRDGPRATMKIMNYDEFQHCW   SKFVYSQ             | RELPEPWNEN                                   |     |
| Bonobo     | IFV   ARLYYFWD | PDYQEALRSLCQ                     | KRDGPRATMKIMNYDEFQHCW   SKFVYSQ             | RELPEPWNEN                                   |     |
| Human      | IFV   ARLYYFWD | PDYQEALRSLCQ                     | KRDGPRATMKIMNYDEFQHCW   SKFVYSQ             | RELPEPWNEN                                   |     |
| Gorilla    | IFV   ARLYYFWD | QDYQEALRSLCQ                     | KRDGPRATMKIMNYDEFQHCW   SKFVYSQ             | RELPEPWNEN                                   |     |
| Orangutan  | IFV   ARLYYFWD | PDYQEALRSLCQ                     | ERDGRANMKIMNYDEFQHCW   NKFVYSQ              | RELPEPWNEN                                   |     |
| WoollyMon  | VST   ARLYCYR  | KKDWRRALRKL                      | SQTG----ARVKIMDYEEFQHCW   DNFVDNQ           | REPPEPWNEN                                   |     |
| Tamarin    | VST   ARIYCYW  | KKDWRRALRKL                      | CQTG----ARVKIMNYKEFAYCW   ENFVYKER          | KPFYRWDK                                     |     |

Human aa: 178 (Active Site 2) 237

AGM LPKHYTLLHATLGE LLRHVMDPGTFTSNFNKPVVSG | QRETYLCYKVERSHNDTWVLLNQ

Patas LPKHYTLLHATLGE LLRHVMDPGTFTSNFNKPVVSG | QRETYLCYKVERSHNDTWVLLNQ

CrestMac LPKHYTLLQATLGE LLRHLM DPGTFTSNFNKPVVSG | QHETYLCYKVERLHNDTWVPLNQ

CrabEatMac LPKHYTLLQATLGE LLRHLM DPGTFTSNFNKPVVSG | QHETYLCYKVERLHNDTWVPLNQ

Baboon LPKHYTLLHATLGE LLRHLM DPGTFTSNFYKPVVSG | QHETYLCYKVERLHNGTWVPLNQ

Chimp LPKYYILLHIMLGE I LRHSMDPPTFTSNFNELWVRG | RHETYLCYEVERLHNDTWVLLNQ

Bonobo LPKYYILLHIMLGE I LRHSMDPPTFTSNFNELWVRG | RHETYLCYEVERLHNDTRVLLNQ

Human LPKYYILLHIMLGE I LRHSMDPPTFTSNFNELWVRG | RHETYLCYEVERMHNDTWVLLNQ

Gorilla LPKYYMLLHIMLGE I LRHSMDPPTFTSNFNELWVRG | RHETYLCYEVERLHNDTWVLLNQ

Orangutan LPKYYIVLHIILGE I LRHSMDPLTFTSNFNELWVRG | RHETYLCYKVERLHNDTWVLLNQ

WoollyMon LPKHYTLLRITLGEVLRHRMDPVTFTYNFTNDPSVLG | QHQSILCYKVEHLRNGTWVPLHQ

Tamarin FSGNYRFLRCKLQEI LRHLMDPGTFTYNFTNDPSVLG | RHQTYLCYEAHLHSGTWVPLHQ

Human aa: 238 297

AGM HRGF LRNQAPDRHGFPKGR**HAEL**CFLDLIPFWKLD-DQQYRVTCFTSWS**PCF**S**CAQ**KMAK

Patas HRGF LRNQAPDRHGFPKGR**HAEL**CFLDLIPFWKLD-DQQYRVTCFTSWS**PCF**S**CAQ**KMAK

CrestMac HRGF LRNQAPNIHGFPKGR**HAEL**CFLDLIPFWKLD-GQQYRVTCFTSWS**PCF**S**CAQ**EMAK

CrabEatMac HRGF LRNQAPNIHGFPKGR**HAEL**CFLDLIPFWKLD-GQQYRVTCFTSWS**PCF**S**CAQ**EMAK

Baboon HRGF LRNQAPDIHGFPKGR**HAEL**CFLDLIPFWKLD-GQQYRVTCFTSWS**PCF**S**CAQ**EMAK

Chimp RRGFLCNQAPHKHGFLEGR**HAEL**CFLDVI PFWKLDLHQDYRVTCFTSWS**PCF**S**CAQ**EMAK

Bonobo RRGFLCNQAPHKHGFLEGR**HAEL**CFLDVI PFWKLDLHQDYRVTCFTSWS**PCF**S**CAQ**EMAK

Human RRGFLCNQAPHKHGFLEGR**HAEL**CFLDVI PFWKLDLHQDYRVTCFTSWS**PCF**S**CAQ**EMAK

Gorilla RRGFLCNQAPHKHGFLEGR**HAEL**CFLDVI PFWKLDLHQDYRVTCFTSWS**PCF**S**CAQ**EMAK

Orangutan RRGFLCNQAPAIHGFPKGR**HAEL**CFLDVI PFWKLDGKQRYRVTCFTSWS**PCF**S**CAQ**EMAK

WoollyMon HRGFILNEASNSVSFPEGR**HAEL**CLLDLISFWKLDPAQTYRVTCFISWS**PCF**S**CAE**KVAE

Tamarin HRGFILNEASNLSFPEGR**HAEL**CLLDLISFWKLDPAQTYRVTCFISWS**PCF**S**CAQ**EVAE

Human aa: 298 (Linker 2) (Pseudo-Active Site 2) 357

AGM FISNNKHVSLCIFA | ARIYDDQGR**CQ**EGLRTLHRDGAKI **I**AVMNYSEFEYCW | DTFVDRQGRP

Patas FISKKKHVSLCIFA | ARIYDDQGR**RQ**EGLRTLHRDGAKI **I**AVMNYSEFKHCW | DTFVDHQGRP

CrestMac FISNNEHVSLCIFA | ARIYDDQGR**YQ**EGLRTLHRDGAKI **I**AMMNYSEFEYCW | DTFVDRQGRP

CrabEatMac FISNNEHLSLCIFA | ARIYDDQGR**YQ**EGLRTLHRDGAKI **I**AMMNYSEFKHCW | DTFVDRQGRP

Baboon FISNNEHVSLCIFA | ARIYDDQGR**CQ**EGLRTLHRDGAKI **I**AMMNYSEFEYCW | DTFVDRQGRP

Chimp FISNNKHVSLCIFA | ARIYDDQGR**CQ**EGLRTLAKAGAKI **S**IMTYSEFKHCW | DTFVDHQGCP

Bonobo FISNNKHVSLCIFA | ARIYDDQGR**CQ**EGLRTLAKAGAEI **S**IMTYSEFKHCW | DTFVDHQGCP

Human FISNNKHVSLCIFT | ARIYDDQGR**CQ**EGLRTLAEAGAKI **S**IMTYSEFKHCW | DTFVDHQGCP

Gorilla FISNNKHVSLCIFA | ARIYDDQGR**CQ**EGLRTLAEAGAKI **S**IMTYSEFKHCW | DTFVYHQGCP

Orangutan FISNNQHVSLCIFA | ARIYDDQGR**CK**EGLRTLDEAEAKI **S**IMTYDEFQHCW | DTFVDHQGRP

WoollyMon FLQENPHVNLHISA | ARIYDYQGR**YK**GLRRLDRAGTPI **S**MMKYSEFKHCW | DTFVDHQGHP

Tamarin FLHENPHVNLRIFA | ARIYDYRPG**YEE**GLLRSLWAGAPI **S**MMKYSGFSHCW | DTFVDHQGRS

|            |                             |     |
|------------|-----------------------------|-----|
| Human aa:  | 358                         | 385 |
| AGM        | FQPWDGLDEHSQALSGRLRAI-----  |     |
| Patas      | FQPWDGLDEHSQALSGRLRAILQNQGN |     |
| CrestMac   | FQPWDGLDEHSQALSERLRAILQNQGN |     |
| CrabEatMac | FQPWDGLDEHSQALSERLRAILQNQGN |     |
| Baboon     | FQPWDGLDEHSQDLSGRLRAILQNQGN |     |
| Chimp      | FQPWDGLEEHSQALSGRLRAILQNQGN |     |
| Bonobo     | FQPWDGLEEHSQALSGRLRAILQNQGN |     |
| Human      | FQPWDGLDEHSQDLSGRLRAILQNQEN |     |
| Gorilla    | FQPWDGLEEHSQALSGRLQAILQNQGN |     |
| Orangutan  | FLPWIRLHEHSEALSGRLRAILLNQGN |     |
| WoollyMon  | FQPWEELNEHSQALSGRLQAILQNQGN |     |
| Tamarin    | FKPWKGLNEHSQALSGRLQAILQIMGN |     |
