# Supplementary material for: Ancient Adaptive Evolution of the Primate Antiviral DNA-Editing Enzyme APOBEC3G
Source: PLoS Biol. 2004 Jul 20;2(9):e275. doi: 10.1371/journal.pbio.0020275 (PMC479043; doi:10.1371/journal.pbio.0020275)
Supplement: Table S1 — (39 KB PDF). [file pbio.0020275.st001.pdf]

Table S1: PCR and Sequencing Strategy (Sawyer et al.)

( ) = PCR primers

\* = sequencing primer

underlined = exonic primer, all others in introns**APOBEC3G**

|                               | Coding Exon 1                    | Coding Exon 2                                                      | Coding Exon 3                          | Coding Exon 4            | Coding Exon 5                              | Coding Exon 6            | Coding Exon 7                                                                            | Coding Exon 8                                            |
|-------------------------------|----------------------------------|--------------------------------------------------------------------|----------------------------------------|--------------------------|--------------------------------------------|--------------------------|------------------------------------------------------------------------------------------|----------------------------------------------------------|
| Chimpanzee 3448               | (019,020) 071*<br>(019,020) 072* | (021,022*)<br>(040*,042)<br>(040,042*)                             | (023,024*)<br>(004*,007)               | (004*,007)               | (004,007*)<br>(025,026*)                   | (054,055*)<br>(054*,055) | (003*,006)<br>(029,030*)<br>(029*,030)                                                   | (029*,030)<br>(029,030*)                                 |
| Bonobo 5352                   | (019*,020)                       | (021,022*)<br>(040*,042)<br>(040,042*)                             | (004*,007)<br>(023*,024)<br>(023,024*) | (004*,007)               | (004,007*)<br>(025,026*)                   | (054*,055)<br>(054,055*) | (029*,030)<br>(047*,048)<br>(047,048*)                                                   | (029,030*)                                               |
| Gorilla 5251                  | (019,020*)<br>(019*,020)         | (021,022*)<br>(040*,042)<br>(040,042*)                             | (023,024*)<br>(004*,007)               | (004*,007)               | (004,007*)<br>(025,026*)                   | (054,055*)<br>(054*,055) | (047,048*)<br>(047*,048)<br>(029*,030)                                                   | (029*,030)                                               |
| Orangutan 4272                | (019*,020)                       | (040,042*)<br>(041,043*)<br>(040*,042)<br>(021,022*)<br>(041*,043) | (023*,024)<br>(023,024*)<br>(004*,007) | (004*,007)               | (025,026*)                                 | (054*,055)<br>(054,055*) | (047,048*)<br>(047,049) 048*<br>(047*,048)<br>(047,049*)<br>(029*,030)<br>(047*,049)     | (047*,049)<br>(047,049) 056*<br>(029*,030)<br>(047,050*) |
| Crab Eating Macaq<br>3446     | (019*,020)                       | (040,042*)<br>(040*,042)<br>(041,043*)<br>(041*,043)               | (004*,015)<br>(023*,024)<br>(026,024*) | (004*,015)               | (004,015*)<br>(025,026*)<br>(004,015) 014* | (054,055*)<br>(054*,055) | (047,049) 048*<br>(047,048*)<br>(047*,049)<br>(047*,048)<br>(047,050) 030*<br>(047,050*) | (047,050) 056*<br>(047,050) 030*<br>(047,050*)           |
| Celebes Crested<br>Macaq 7101 | (019*,020)                       | (041,043*)<br>(041*,043)                                           | (023,024*)<br>(004*,015)               | (004*,015)               | (004,015*)<br>(025,026*)<br>(004,015) 014* | (054*,055)<br>(054,055*) | (047*,048)<br>(047*,050)                                                                 | (047,050*)                                               |
| Patas 6254                    | (019*,020)                       | (041,043*)<br>(041*,043)                                           | (023*,024)<br>(023,024*)<br>(004*,015) | (004*,015)               | (004,015*)<br>(025,026*)<br>(004,015) 014* | (054*,055)<br>(054,055*) | (047,049*)                                                                               | (029*,030)<br>(047,049*)                                 |
| Baboon                        | (019*,020)                       | (041*,043)<br>(041,043*)<br>(040*,042)<br>(040,042*)               | (023,024*)                             | (075*,076)<br>(075,076*) | (025,026*)<br>(004,015) 014*<br>(004,015*) | (054,055*)<br>(054*,055) | (047*,050)<br>(047,050*)<br>(047*,048)<br>(047,048*)                                     | (047,050*)                                               |

|             |            |                                                                                                                                                    |                          |                          |                          |                          |                              |            |
|-------------|------------|----------------------------------------------------------------------------------------------------------------------------------------------------|--------------------------|--------------------------|--------------------------|--------------------------|------------------------------|------------|
| Woolly 5356 | (019*,020) | (041,043*)<br>(041,043) 042*<br>(041*,022)<br>(041,022) 042*<br>(095,096*)<br>(095,096) 097*<br>(095,096) 098*<br>(041,043) 097*<br>(041,043) 098* | (073,094*)<br>(073*,094) | (075*,076)<br>(075,076*) | (077*,078)<br>(077,078*) | (054,055*)<br>(054*,055) | (047*,050)<br>(047,050) 048* | (047,050*) |
|-------------|------------|----------------------------------------------------------------------------------------------------------------------------------------------------|--------------------------|--------------------------|--------------------------|--------------------------|------------------------------|------------|

|              |            |                              |                                                                                      |                                                                        |            |                          |                                        |                                            |
|--------------|------------|------------------------------|--------------------------------------------------------------------------------------|------------------------------------------------------------------------|------------|--------------------------|----------------------------------------|--------------------------------------------|
| Tamarin 5308 | (019*,020) | (041,043) 042*<br>(041*,043) | (073*,076)<br>(073,091*)<br>(073,094) 091*<br>(073,094*)<br>(073*,091)<br>(073*,094) | (092,076*)<br>(093,076*)<br>(092*,076)<br>(093*,076)<br>(092,076) 093* | (025,026*) | (054,055*)<br>(054*,055) | (047*,050)<br>(047,050*)<br>(047,050*) | (047,050) 056*<br>(047,050*)<br>(047,050*) |
|--------------|------------|------------------------------|--------------------------------------------------------------------------------------|------------------------------------------------------------------------|------------|--------------------------|----------------------------------------|--------------------------------------------|

## Apobec2

|                |                                                             |                                           |
|----------------|-------------------------------------------------------------|-------------------------------------------|
| Orangutan 4272 | Coding Exon 1<br>(123*,124)<br>(123,124) 119*<br>(123,124*) | Coding Exon 2<br>(120,121*)<br>(120*,121) |
|----------------|-------------------------------------------------------------|-------------------------------------------|

## Apobec1

|                |                                           |                                           |                                                             |                                           |                                           |
|----------------|-------------------------------------------|-------------------------------------------|-------------------------------------------------------------|-------------------------------------------|-------------------------------------------|
| Orangutan 4272 | Coding Exon 1<br>(102*,103)<br>(102,103*) | Coding Exon 2<br>(104*,106)<br>(104,106*) | Coding Exon 3<br>(108,111) 109*<br>(108*,111)<br>(108,111*) | Coding Exon 4<br>(112*,113)<br>(112,113*) | Coding Exon 5<br>(114*,117)<br>(114,117*) |
|----------------|-------------------------------------------|-------------------------------------------|-------------------------------------------------------------|-------------------------------------------|-------------------------------------------|

## Apobec3C

|              |                                           |                                           |                                                                 |                                                             |
|--------------|-------------------------------------------|-------------------------------------------|-----------------------------------------------------------------|-------------------------------------------------------------|
| Gorilla 5251 | Coding Exon 1<br>(037,038*)<br>(037*,038) | Coding Exon 2<br>(039*,031)<br>(039,031*) | Coding Exon 3<br>(032,033) 057*<br>(032,033*)<br>(032,033) 058* | Coding Exon 4<br>(059*,060)<br>(059,060*)<br>(059,060) 080* |
|--------------|-------------------------------------------|-------------------------------------------|-----------------------------------------------------------------|-------------------------------------------------------------|

| Oligo Name | Sequence                   |     |                                     |
|------------|----------------------------|-----|-------------------------------------|
| 003        | GAGACTGAGGCCCATCCTTCAG     | 043 | CTGGCTTAGCTCCTGCCTGC                |
| 004        | TGGAGCCCCTGCACAAAGTG       | 044 | GGTTGGGAGTTTGAGACCAGCC              |
| 005        | GGGTCCCAGAAGTAGTAGAGGCG    | 045 | GTGGTGCATGCCTGTAATCCTAGC            |
| 006        | GGACGGCATGAGACTTACCTGTG    | 046 | GGCTGACCCCATCCTACTCC                |
| 007        | ATGCGCTCCACCTCATAACACAG    | 047 | GTCTGTCTTGAGAGTCATGGGC              |
| 008        | AATGGATCCACGCACATTCTGTCT   | 048 | CAGGGAACCCAGAGGAGGC                 |
| 009        | CACCTTGTGCAGGGGCTCCA       | 049 | GCTCAACCCAGGTCTCTGCC                |
| 010        | GTGGCATGTGGACCGCTC         | 050 | AGGAGTGCATTGCTTTGCTGG               |
| 011        | CGGCCAAGGATGAAGCCTCA       | 051 | GCCACAGATGAAGCCTCAGACCAG            |
| 012        | CCTGTGTTACAAGGTGGAGCGC     | 052 | CAGGTAGGTCTGGTGCCGTCC               |
| 013        | GCGCTCCACCTTGTAACACAGG     | 053 | CCTGTGCTGGTGACGCGG                  |
| 014        | TGATGGATCCAGGCACGTTAC      | 054 | ACCTCATGGCTTGCTTTCTTTCTAG           |
| 015        | CTGGTTGCGTAGAAAGCC         | 055 | CCTACTCCAGGCTTCCATTCTCAC            |
| 016        | GAGACTGAGGCCCATCCTCA       | 056 | CCAGGCCTCCACCATATGCC                |
| 017        | GCCCATCCTTCAGTTTTCTGATTC   | 057 | CCTCCTCCTCCTTCGCCAG                 |
| 018        | GGCCCGAAGCCTTCCACTC        | 058 | CAGCCCCCACGTCTCAC                   |
| 019        | GAGCGGCCTGTCTTTATCAGAGG    | 059 | GGCCCAGGGAGACCCCTC                  |
| 020        | GACCTGGGCTGGGACAGATGG      | 060 | CTCACTGTTTTCTCCTTGTTTTTCTCAG        |
| 021        | GTTTAGTGACATCAGCCCGGAG     | 071 | CCCTGGGAGGTCACTTAGGG                |
| 022        | TCAGGGCCACGGACTTGG         | 072 | GCTGGGGCAGGGGAAGG                   |
| 023        | CTCATAGCTGCTTGTAGGTGCCAC   | 073 | TGACCCTGCTCCTCTCCAG                 |
| 024        | CCACAGGTATGTGTGGGAAGGAC    | 074 | CCCTGAACCTCCCACTTCTCAC              |
| 025        | CCCTTCTGACAGGTGCTAAGGG     | 075 | CTTGACTGCGTTCTCTTCTTTTCTTAG         |
| 026        | GCTACAGGAAGCACAGGTGACAGAC  | 076 | GCCTGGAGGGGAGACCCTCAC               |
| 027        | GCTACTTGTA CACTCCAGCCTGGGC | 077 | GGCTTTTCTCCCACTGTCCACAG             |
| 028        | GATCAAGGCCTTCCCACAGG       | 078 | CGGGTGGCTGGTGATCAC                  |
| 029        | CCACCACGATCCCACAGC         | 080 | CAGATTTTAAATATTGTTGGGAAAAC TTTGTG   |
| 030        | GGAGATGGTGGTGAACAGCCTG     | 084 | GCTGGGACCTGTTCACAAATG               |
| 031        | GGGCACATCACTTATTGTTGCG     | 085 | CTCCCCAATAAAAATTATCAACAAGTTGTACTTAC |
| 032        | CCCTGCACTCCTCCTGCTCC       | 086 | CTGACCCCTGGTGGTTCACAG               |
| 033        | CATGCTGTCCCTCCTGCACC       | 087 | CCAGGACCAAACACAGCAGGG               |
| 037        | CACACCAGTGCCTGAGCAGG       | 088 | CATCAAGCATTGGTTTCATCATGG            |
| 038        | GCTGAGGCCCAGCAGGAC         | 089 | GCCACCATTTATTCTTGATCTTTTCTAG        |
| 039        | CCAGGCAGCTGTGTTCAGTGG      | 090 | AGCTTCTCAAAGGCCACCCC                |
| 040        | GAGGCCTAGAGCCGTCCAGG       | 091 | CTGACCCCTCCACCTCCTCAC               |
| 041        | GGAGTGCTCTCTACATTGGCTGG    | 092 | GTGAGGAGGTGGAGGGGTCAG               |
| 042        | AGTGATTGGAGTCCGGGTGG       | 093 | ACTCCTTCCTGCTTCTCCATCTCAG           |
|            |                            | 094 | CTGAGATGGAGAAGCAGGAAGGAGT           |

095 GGCTGGTTTCTCTCTTGTGTCTTCAG  
096 CAGATTAATTGGAATCTGGGGGGTAC  
097 GATCCAGGCAAATTCTTCCGC  
098 GTTTTATTTTCACTTCATAGCACAGCC  
099 CCAGGGGGCTGTGTTTAGTGG  
100 GAAGGACACACTGGATAGCCCG  
101 CATAACTGCCTGAGATGCGGG  
102 TCTGCCCCAAGCAGGTGGC  
103 TGTCAAGAATACTTGCCAAGCCC  
104 TTCTGAGATGATTGGAGGTTTGG  
105 GAGTGTGTTTGACATAATCATATCTTGGTC  
106 CATTGATTCTTGATCAAATTAATGGGC  
107 GGGATTATAGGCGCATGTGCC  
108 GGAAAAGATTCTAAGATCTCTCTAAATGTGGC  
109 AGTGTGGGCTGCTTTTGTATTCAG  
110 GTTGTAACAATGAAGTTCTTTGTTTACTGTTTTAC  
111 CCAATCTTCTGGCCTAAAAACAGC  
112 GAATGAGCCAAGATTGTGTTTCCTTAG  
113 CATCAACATTTGTGTCCCTAAAGTGACTTAC  
114 TTCCAAGTACATTTTAAATGTTTGTGG  
115 CATCCTAAGGATTAAATATAATCCTTTTTTATTCCAG  
116 GAATCAGTACACACACGGAATCATCC  
117 ATTCTAAATGGCATTCACTCTTTAGTGGG  
118 CTGAGCCACAGCCCCCTCC  
119 ACCCTGACCCACATCTGAGGC  
120 TCCTGTCCTTTGTCTCCTTGACC  
121 GAGGCAAAGCCCAGTTGCC  
123 AGCCAGATTTAGCTGCTGACAGC  
124 CCTGAATTTCCACAGCCTAACCC
